# 1 **Physcomitrella SUN2 mediates MTOC association to the nuclear** 2 **envelope and facilitates chromosome alignment during spindle assembly**

3  
4 **Mari W. Yoshida<sup>1</sup>, Noiri Oguri<sup>1</sup>, and Gohta Goshima<sup>1,2\*</sup>**

5 1. Department of Biological Science, Graduate School of Science, Nagoya University, Nagoya 464-8602, Japan

6 2. Sugashima Marine Biological Laboratory, Graduate School of Science, Nagoya University, Toba 517-0004,  
7 Japan

8 \*To whom correspondence should be addressed. Email: [goshima@bio.nagoya-u.ac.jp](mailto:goshima@bio.nagoya-u.ac.jp)

9 Author contributions: M.W.Y. and G.G. designed the research; M.W.Y. and N.O. performed the experiments.

10 M.W.Y. analysed the data; M.W.Y. and G.G. wrote the paper.

---

## 11 **Abstract**

12  
13 Plant cells lack centrosomes and instead utilise acentrosomal microtubule organising  
14 centres (MTOCs) to rapidly increase the number of microtubules at the onset of spindle  
15 assembly. Although several proteins required for MTOC formation have been identified,  
16 how the MTOC is positioned at the right place is not known. Here, we show that the inner  
17 nuclear membrane protein SUN2 is required for MTOC association with the nuclear  
18 envelope (NE) during mitotic prophase in the moss *Physcomitrium patens*. In actively  
19 dividing protonemal cells, microtubules accumulate around the NE during prophase. In  
20 particular, regional MTOC is formed at the apical surface of the nucleus. However,  
21 microtubule accumulation around the NE was impaired and apical MTOCs were  
22 mislocalised in *sun2* knockout (KO) cells. In addition, chromosome distribution in the  
23 nucleus was skewed, suggesting that SUN2 mediates the linking of microtubules with  
24 chromosomes. Upon nuclear envelope breakdown (NEBD), the mitotic spindle was  
25 assembled with mislocalised MTOC, which were a source of microtubules in *sun2* KO  
26 plants. However, completion of chromosome alignment in the spindle was delayed; in  
27 severe cases, the chromosome was transiently detached from the spindle body. SUN2  
28 tended to localise to the apical surface of the nucleus during prophase in a microtubule-  
29 dependent manner. Based on these results, we propose that SUN2 facilitates the  
30 attachment of microtubules to chromosomes during spindle assembly by linking them  
31 prior to NEBD. Furthermore, this study suggests that trans-NE microtubule-chromosome  
32 linking, a well-known function of SUN in animals and yeast, is conserved in plants.

---

## 33 **Key words**

34 Microtubule organising centre (MTOC) / LINC complex / chromosome congression /  
35 nuclear migration / *Physcomitrium patens*

---

## 36 **Introduction**

37  
38 The linking of the nucleus to the cytoskeleton is a common feature of eukaryotic  
39 cells. The nuclear-associated cytoskeleton determines nuclear position, which is involved  
40 in cell physiology and fate, and applies force to the nucleus, which affects gene expression  
41 (Almonacid et al., 2019; Gundersen and Worman, 2013). Linkage between the nucleus  
42 and the microtubule organising centre (MTOC) has been reported in animals and fungi;

43 centrosomes in certain animal cell types and the spindle pole body (SPB) in yeast are  
44 associated with the nuclear envelope (NE) (Mejat and Misteli, 2010). The key conserved  
45 factors that link the nucleus to the cytoskeleton in animals and yeasts is the linkers of the  
46 nucleoskeleton to the cytoskeleton (LINC) complex, which comprises the inner nuclear  
47 membrane protein SUN and the outer nuclear membrane protein KASH (Jahed et al.,  
48 2021; Meier, 2016; Mejat and Misteli, 2010). SUN has three recognisable domains: a  
49 transmembrane region, multimerisation domain, and C-terminal SUN domain. The SUN  
50 domain binds to the C-terminus of KASH in the nuclear intermembrane region, whereas  
51 the N-terminus of SUN interacts with chromosomes. The N-terminus of the KASH  
52 protein interacts with microtubules and/or actin filaments in the cytoplasm either directly  
53 or via motor proteins (myosin, kinesin, and dynein). Mutations in SUN in animals cause  
54 a variety of cellular defects, such as nuclear deformation and mispositioning, and  
55 sometimes cause diseases in humans (Meinke et al., 2014; Mejat and Misteli, 2010). In  
56 yeast, mutations in SUN lead to lethality owing to the failure of SPB separation and  
57 bipolar spindle formation during mitosis (Hagan and Yanagida, 1995; Jaspersen et al.,  
58 2006). The role of SUN in telomere anchorage during meiosis is also conserved in yeast  
59 and animals (Mejat and Misteli, 2010).

60 In plants, the SUN family is classified as Cter-SUN or mid-SUN depending on  
61 whether the SUN domain is located near the C-terminus, similar to animal and fungal  
62 SUNs, or in the middle of the protein (Graumann et al., 2014). Similar to animal/yeast  
63 orthologues, Cter-SUN is an inner nuclear membrane protein required for nuclear  
64 morphology, movement, and telomere anchorage during meiosis (Meier et al., 2017). In  
65 *AtSUN1* mutant, the shape of the nucleus is circular (Oda and Fukuda, 2011; Zhou et al.,  
66 2012). In contrast, the plant-unique mid-SUN is localised not only in the NE, but also in  
67 the ER (Graumann et al., 2014). Arabidopsis mid-SUNs (SUN3, 4, 5) are redundantly  
68 essential for early seed development and are involved in nuclear morphology (Graumann  
69 et al., 2014). Regarding the link to the cytoskeleton, nuclear migration in Arabidopsis is  
70 driven by actin and myosin XI-i, which bind to the WIT-WIP complex, i.e., the functional  
71 homologue of KASH, which interacts with SUN (Tamura et al., 2013). However, whether  
72 the SUN-KASH bridge is linked to the microtubule cytoskeleton in plants remains  
73 unclear.

74 The moss *Physcomitrium patens* is a model system suitable for studying cytoskeletal  
75 and nuclear dynamics, owing to its amenability to high-resolution live microscopy and  
76 gene editing techniques. Recent studies have revealed that microtubules and two kinesin  
77 family proteins drive nuclear migration (KCH for retrograde migration and ARK for  
78 anterograde migration) (Yamada and Goshima, 2018; Yoshida et al., 2023). However, the  
79 mechanisms by which KCH and ARK recognise the nucleus remain unclear. We initiated  
80 the current study to test the hypothesis that the SUN-KASH-kinesin axis is responsible  
81 for nuclear motility. First, we attempted to conduct a loss-of-function study of *SUN* genes,  
82 which are more easily identifiable via sequence homology searches than *KASH/WIP/WIT*  
83 genes. In addition to nuclear motility, we observed defects in MTOC and chromosomal  
84 positioning in prophase following the deletion of *SUN2*, one of two Cter-SUN. Moreover,  
85 the *sun2* knockout (KO) line showed delayed chromosome congression during  
86 prometaphase. Thus, this study showed that SUN is involved in MTOC positioning and  
87 attachment to the NE, revealing the functional conservation of SUN in the three major  
88 kingdoms. Furthermore, the data suggest that microtubule attachment to the chromosome

89 during spindle assembly is facilitated by trans-NE linkage, which is mediated by SUN2  
90 at a prior stage.

91

## 92 **Results**

93

### 94 **Nuclear migration in subapical cells is suppressed in the absence of SUN2**

95 *P. patens* possesses two Cter-SUNs (SUN1 and SUN2) and two mid-SUNs (SUN3  
96 and SUN4) (Fig. 1A). To investigate the function of Cter-SUN in *P. patens*, we aimed to  
97 delete nearly the entire open reading frame (ORF) of *SUN1* and *SUN2* using  
98 CRISPR/Cas9 in a line expressing GFP-tubulin and histoneH2B-mCherry. We  
99 successfully obtained knockout (KO) lines for *SUN2* (Fig. S1A, B). The *sun2* KO line  
100 grew indistinguishably from the parental line on culture plates (Fig. 1B, C).

101 To identify the phenotypes of the *sun2* KO line at the cellular level, we conducted  
102 long-term time-lapse imaging of the microtubules and chromosomes using low-resolution  
103 microscopy (Fig. 2A; Movie 1). Changes in nuclear morphology were not convincingly  
104 detected by this microscopy. In contrast, abnormal nuclear movement was observed. In  
105 the wild-type protonemata, the daughter nuclei moved in the apical direction in the apical  
106 daughter cell and in the basal direction in the subapical daughter cell after apical cell  
107 division (Fig. 2A, B). In the *sun2* KO line, nuclear movement of apical cells was  
108 comparable to that of control cells. However, the rate of basal motility significantly  
109 decreased in the subapical cells from 145 min after anaphase onset (Fig. 2B, C). In  
110 addition, abnormal apical movement was occasionally observed (Fig. 2C, magenta). This  
111 phenotype was suppressed by the ectopic SUN2-mCherry expression, indicating that the  
112 observed motility defects were caused by SUN2 depletion. We conclude that directional  
113 nuclear migration during interphase is partially impaired by the loss of *SUN2*.

114

### 115 **Mitosis is delayed in the absence of SUN2**

116 In addition to nuclear motility, we identified mitotic defect in the *sun2* KO line. *P.*  
117 *patens* protonemal apical cells undergo highly precise mitotic cell division under  
118 laboratory culture conditions (Nakaoka et al., 2012). We confirmed this by observing 55  
119 mitotic events in the control line: the duration from nuclear envelope breakdown (NEBD)  
120 to anaphase onset was  $13.9 \pm 1.32$  min ( $\pm$  SD). This duration was significantly increased  
121 in the *sun2* KO line ( $16.3 \pm 1.76$  min;  $n = 50$ ) (Fig. 2D). This phenotype was suppressed  
122 when SUN2-mCherry was ectopically expressed ( $14.6 \pm 1.41$  min,  $n = 55$ ).

123 To test whether the N-terminal (putative chromatin-binding) or C-terminal (putative  
124 KASH/WIP-binding) domain of SUN2 is responsible for mitotic progression, two  
125 truncated constructs were constructed and individually transformed into the *sun2* KO line.  
126 Neither construct restored mitotic duration; rather, they further extended it (Fig. 2D).  
127 These results indicated that both termini are required for rapid mitotic progression.

128 For unknown reasons, we were unable to obtain a moss line with complete deletion  
129 of the *SUN1* gene. Therefore, we generated *SUN1* loss-of-function mutants using  
130 CRISPR/Cas9 with different guide-RNA sets. We obtained three alleles from the  
131 background of *sun2* KO lines. In one allele, a 298 bp deletion was detected in exon2 and  
132 exon3 of *SUN1* (*sun1-1/sun2* KO allele) (Fig. S1C). This is likely a strong loss-of-  
133 function allele of Cter-SUN. However, the mitotic duration was not further extended  
134 compared to single *sun2* KO (Fig. 2E). These results indicate that SUN2 plays a major  
135 role in controlling cell division in protonemata.

136

### 137 **SUN2 is required for proper positioning of mitotic MTOC in protonemal cells**

138 To examine the nuclear morphology and spindle/chromosome dynamics, we used  
139 high-resolution live microscopy. In the control line, the nucleus in the subapical cells was  
140 ellipsoidal during interphase, whereas it was rounder in the apical cells (Fig. 3A, B).  
141 Nuclear morphology dynamically changes during prophase in apical cells. The nucleus  
142 became ellipsoidal or diamond-shaped 10–90 min before NEBD, concomitant with the  
143 observation of the surrounding microtubule bundles (Fig. 3C, D). The microtubules  
144 applied force to the nucleus: no change in shape was observed when the microtubules  
145 were depolymerised with oryzalin (see Fig. 6B). Nuclear shape was markedly different  
146 in the *sun2* KO line. During interphase in subapical cells and prophase in apical cells, the  
147 nucleus remained round-shaped in the *sun2* KO line (Fig. 3A–D). Microtubule bundles  
148 around the NE were less prominent in the KO background during prophase and interphase  
149 (Fig. 3A, C, E). The nuclear phenotype was rescued by ectopic expression of SUN2-  
150 mCerulean. Thus, SUN2 is required for microtubule-dependent nuclear morphogenesis,  
151 which is consistent with previous observations in Arabidopsis (Oda and Fukuda, 2011;  
152 Zhou et al., 2012).

153 Just before NEBD (<10 min), the nucleus in the control apical cells transformed again  
154 to round shape, accompanied by the emergence of microtubule ‘apical cap’, which refers  
155 to the accumulation of microtubules at the apical side of the nuclear surface (Fig. 4A,  
156 Movie 2). These microtubules, as MTOC, are thought to offer a force to change nuclear  
157 morphology, move the late prophase nucleus, and serve as the initial source of spindle  
158 microtubules after NEBD (Nakaoka et al., 2012). The apical cap was infrequently  
159 observed in *sun2* KO line (Fig. 4A, Movie 2). Instead, MTOCs were detected at different  
160 positions in 21 of the 25 cells (Fig. 4B). This characteristic phenotype was suppressed by  
161 SUN2-mCerulean expression, indicating that the apical cap abnormality was caused by  
162 SUN2 protein depletion. Microtubule bundles around the NE on the basal side also  
163 reduced (Fig. 4A, Movie 2). We conclude that SUN2 is required for microtubule  
164 association with NE in late prophase.

165

### 166 **SUN2 is required for efficient chromosome-microtubule interaction**

167 In addition to MTOC position, high-resolution imaging revealed differences in  
168 chromosomal dynamics during spindle assembly (Fig. 5A, Movie 2). In control cells, the  
169 nucleus rapidly migrated apically in late prophase, followed by NEBD (Fig. 5B, C  
170 [kymographs]). The apical motility of the chromosomes persisted for a few minutes after  
171 NEBD. Chromosomes on the basal side of the nucleus travelled more rapidly and over  
172 longer distances than those on the apical side, leading to chromosome congression at the  
173 spindle equator within ~10 min (Fig. 5C). In contrast, rapid apical movement of the  
174 nucleus in late prophase and prometaphase was largely suppressed in the *sun2* KO line.  
175 Furthermore, the histone signal in the kymograph tended to extend basally after NEBD;  
176 consequently, the initiation of apical migration was delayed (red arrowheads in Fig. 5B  
177 and C). In two cases, we observed a clearly misaligned chromosome detached from the  
178 spindle body (Fig. 5A, arrowheads). However, misaligned chromosomes were eventually  
179 captured by spindle microtubules during prolonged prometaphase, which was different  
180 from kinetochore deficiency, in which chromosome congression is never achieved  
181 (Kozgunova et al., 2019). We conclude that SUN2 facilitates chromosome alignment in  
182 the spindle.

183 During mitosis observation, we noticed that chromosomal organisation within the  
184 nucleus was skewed in late prophase in the *sun2* KO line. The fluorescent histone marker  
185 visualised the nucleosome-based chromosomes and RNA-rich nucleolus as distinct  
186 signals (Fig. 5D). The nucleolus is usually located at the centre of the nucleus during  
187 interphase and early prophase. However, just before or after NEBD, chromosome masses  
188 were more enriched on the apical side, and consequently, the nucleolus was positioned  
189 closer to the basal edge of the nucleus in control cells (Fig. 5D–H). In contrast, the  
190 nucleolus remained medially localised and a clear bias in chromosome distribution was  
191 not observed in the *sun2* KO line. These observations suggest that SUN2 mediates trans-  
192 NE microtubule-chromosome interactions at the onset of NEBD.

193

### 194 **Asymmetric SUN2 distribution during apical MTOC assembly**

195 As expected, endogenous SUN2 tagged with mNeonGreen (mNG) was uniformly  
196 localised to the NE during interphase (Fig. 6A). In contrast, time-lapse microscopy and  
197 signal quantification indicated that SUN2 localisation was asymmetric in late prophase;  
198 SUN2-mNG was more enriched on the apical side, partially overlapping the microtubule  
199 apical cap (Fig. 6B, C).

200 To test whether the asymmetric distribution was dependent on microtubules, we  
201 depolymerised the cytoplasmic microtubules with oryzalin, followed by time-lapse  
202 microscopy. Quantification of signal intensity showed no apical accumulation of SUN2  
203 in late prophase under these conditions (Fig. 6B, C). In contrast, the depolymerisation of  
204 actin filaments with latrunculin A did not disrupt the asymmetric distribution of SUN2  
205 (Fig. 6B, C). These results indicate that apical enrichment of SUN2 and microtubules is  
206 mutually dependent.

207 During spindle assembly, SUN2-mNG initially showed punctate signals on the  
208 spindle (Fig. 6D). The number of signals gradually decreased, and the spindle at  
209 metaphase was cleared.

210

### 211 **SUN2 controls MTOC position and microtubule-NE interaction in the gametophore 212 initial**

213 The gametophore in *Physcomitrella* is the leafy shoot, which develops from  
214 protonemal filaments. In the first stage of gametophore development, stem cells undergo  
215 a type of asymmetric division distinct from that of the protonemata (Harrison et al., 2009;  
216 Kofuji and Hasebe, 2014). We examined the role of Cter-SUN in this cell type. Similar  
217 to the protonemata, a portion of the microtubules surrounded the NE during prophase in  
218 the gametophore initial cells (Fig. 7A, red arrowhead). We observed that the signals of  
219 NE-surrounding microtubules decreased in the absence of SUN2 (Fig. 7A). In addition,  
220 in this system, the microtubule cloud, or also called regional MTOC ‘gametosome’,  
221 emerges at the apical cytoplasm and functions as the dominant microtubule nucleation  
222 site (Kosetsu et al., 2017) (Fig. 7A, green arrowhead). In control cells, gametosomes  
223 appeared in the apical cytoplasm in prophase, and the line connecting the nuclear and  
224 gametosome centres was nearly parallel to the long axis of the cell (Fig. 7B, C). In the  
225 *sun2* KO line, gametosomes were formed normally. However, its position relative to the  
226 nucleus was more variable (Fig. 7C). Thus, SUN2 plays a similar role in the gametophore  
227 initial cell in terms of microtubule-NE association and cytoplasmic MTOC (i.e.  
228 gametosome) positioning. The gametosome dictates spindle orientation, and  
229 consequently, the division plane in gametophore initial cells (Kosetsu et al., 2017).

230 Consistent with the variable positions of the gametosome, the orientation of the  
231 metaphase spindle (Fig. 7D–F) and cell plate (Fig. 7G–I) were also variable in the *sun2*  
232 KO line. These results suggest that SUN2-mediated linkage between NEs and  
233 microtubules is required for proper orientation of the mitotic spindle and, thereby, that of  
234 the division plane.

235

## 236 **Discussion**

237

238 The contribution of nuclear membrane proteins to cellular events in plants remains  
239 poorly understood. In this study, we found that the SUN2 protein in *P. patens* not only  
240 plays a well-established role in nuclear shaping and positioning but also facilitates  
241 chromosome alignment during mitosis. A series of live imaging supports a model in  
242 which SUN2 mediates the interaction between MTOC and the nucleus during mitotic  
243 prophase, enabling the efficient association of microtubules with chromosomes during  
244 spindle assembly.

245

### 246 **Physcomitrella SUN2 couples NE with microtubules**

247 The loss of centrosomes is a striking evolutionary event in plant lineages  
248 (Buschmann and Zachgo, 2016). Several types of acentrosomal MTOCs have been  
249 developed as centrosome substitutes (Buschmann et al., 2016; Lloyd and Chan, 2006;  
250 Naramoto et al., 2022; Yi and Goshima, 2018). In some cases, the proteins required for  
251 MTOC formation have been identified (Liu and Lee, 2022). However, little is known  
252 about the spatial control of acentrosomal MTOCs in plants. The apical cap of the moss  
253 protonema represents a form of MTOC that requires  $\gamma$ -tubulin and TPX2 for formation  
254 and functions in early phase of mitosis as the major source of spindle microtubules  
255 (Kozgunova et al., 2022; Nakaoka et al., 2012). The current study demonstrates that  
256 SUN2 is required for the association between MTOCs and NE. A plausible mechanism  
257 is that SUN2 links cytoplasmic MTOC to the NE through unidentified KASH/WIP/WIT  
258 proteins. Microtubule-dependent apical enrichment of SUN2 during prophase is  
259 consistent with this notion. The function of SUN2 may not be limited to the prophase; the  
260 interphase nucleus was deformed concomitant with a reduction in the surrounding  
261 microtubules in the *sun2* KO line. In animals, the SUN protein forms a central part of the  
262 LINC complex, which connects the cytoskeleton, including microtubules and actin, with  
263 nuclear laminae and chromosomes across the NE (Gundersen and Worman, 2013; Mejat  
264 and Misteli, 2010). In Arabidopsis, SUN mediates actin-NE interactions via WIP/WIT  
265 and myosin XI-i (Tamura et al., 2013). Our results indicated that the microtubule-linking  
266 function of SUN is preserved in plants.

267

### 268 **SUN2 facilitates chromosome-microtubule interaction during mitosis**

269 The skewed distribution of prophase chromosomes in the *sun2* KO line, exemplified  
270 by the mispositioned nucleolus, suggests that SUN2 also mediates the coupling of  
271 chromosomes with microtubules. It is conceivable that the proximity of microtubule  
272 bundles to chromosomes facilitates their interactions with NEBD. Therefore, we propose  
273 that microtubule mispositioning outside the nucleus and chromosome disorganisation  
274 within the prophase nucleus additively delay microtubule-chromosome interactions  
275 during spindle assembly. However, it is not ruled out that SUN2 also actively participates

276 in the spindle assembly process during early prometaphase, for example, by removing  
277 nuclear membrane remnants in the spindle matrix (Turgay et al., 2014).

278 Our model is reminiscent of what is known about *S. pombe* Sad1, the founder of the  
279 SUN family (Hagan and Yanagida, 1995). In yeast, NE does not completely disassemble  
280 during mitosis. Instead, the insertion of SPB, i.e., point MTOC, into NE is critical for  
281 spindle assembly during mitosis (Fernandez-Alvarez et al., 2016; Jaspersen et al., 2006;  
282 Mejat and Misteli, 2010). Sad1 is localised to the SPB throughout the cell cycle and links  
283 to the centromeres of each chromosome during interphase. Mutant analysis has shown  
284 that pre-mitotic contact between centromeres and SPB is required for proper initiation of  
285 mitosis (Fernandez-Alvarez et al., 2016). Thus, the SUN-mediated trans-NE connection  
286 between MTOC and chromosomes may be a conserved mechanism that guarantees robust  
287 cell division, despite a significant morphological difference between the SPB (point  
288 MTOC) and apical cap (regional MTOC).

289

### 290 **Limitations of the study**

291 Compared with the known loss-of-function phenotype of SUN in animal cells, the  
292 phenotypes observed in this study were mild. For example, we did not detect defects in  
293 nuclear migration in the apical cells of *sun2* KO or *sun1-1 / sun2* KO. Similarly, in  
294 Arabidopsis, *sun1* KO / *sun2* knockdown line showed no dramatic developmental or  
295 fertility defects under laboratory conditions (Oda and Fukuda, 2011; Zhou et al., 2012).  
296 We speculate that this is due to the presence of the intact mid-SUN in the mutants, which  
297 may also act as a linker between microtubules and NE (Graumann et al., 2014; Meier et  
298 al., 2017). Despite several attempts using different constructs, we could not obtain KO or  
299 mutant alleles for *SUN3*; *SUN3* might be required for essential processes in cell  
300 proliferation. Similarly, the Arabidopsis mid-SUN triple mutant is lethal (Graumann et  
301 al., 2014). A comprehensive loss-of-function analysis of Cter- and mid-SUN would be an  
302 interesting topic for future research.

303 The types of plant MTOCs that require SUN for localisation are another outstanding  
304 question. In seed plants, many cell types develop a specialised regional MTOC called  
305 ‘polar cap’ or ‘pro-spindle’ in late prophase, which caps both apical and basal sides of  
306 the NE (Liu and Lee, 2022; Smirnova and Bajer, 1998). AtSUN1 and AtSUN2 are  
307 abundantly localised at the polar cap (Oda and Fukuda, 2011; Tatout et al., 2014). It  
308 would be interesting to revisit the *sun* mutants and examine whether SUN mediates the  
309 association between NE and this type of MTOC.

310

### 311 **Materials and methods**

312

313 The majority of the methods used in this study were identical to those described in our  
314 recent studies (Ta et al., 2023; Yoshida et al., 2023).

315

#### 316 ***P. patens* culture and transformation**

317 All strains in this study were derived from the Gransden ecotype of *Physcomitrium*  
318 (*Physcomitrella*) *patens* (Ashton and Cove, 1977). *P. patens* culture and transformation  
319 protocols followed were as described by (Yamada et al., 2016). Briefly, mosses were  
320 regularly cultured on BCDAT plates at 25 °C under continuous light illumination. A  
321 standard polyethylene glycol (PEG)-mediated method was exploited for transformation.

322 Prior to transformation, sonicated protonemata were cultured on BCDAT agar medium  
323 for 5–6 d. Transgenic lines were selected using corresponding antibiotics. Line  
324 confirmation was conducted through visual inspection followed by genotyping PCR (Fig.  
325 S1, Table S4). Sequencing was performed to confirm the CRISPR mutant lines. The lines  
326 generated in this study are listed in Table S1.

327

### 328 **Plasmid construction**

329 The plasmids and primers used in this study are listed in Tables S2 and S3, respectively.  
330 CRISPR targets with high specificity were manually selected in the first three exons of  
331 *SUN1* gene, and the regions near the start or stop codons of *SUN2* gene. All target  
332 sequences were synthesised and ligated into the *BsaI* site of pPY156, which is based on  
333 pCasGuide/pUC18 and contains a hygromycin-resistant cassette (Lopez-Obando et al.,  
334 2016; Yi and Goshima, 2020). For endogenous tagging via homologous recombination,  
335 the plasmid was constructed using the In-Fusion HD Cloning Kit (Takara); 1–2 kb  
336 sequences of the 5′ and 3′ ends of the genes of interest flanked the fragment that consisted  
337 of an in-frame linker, mNeonGreen (mNG) tagged with FLAG, or mCherry coding  
338 sequence, and G418 or blasticidin S resistant cassette. The mNG codon was optimised  
339 for expression in Arabidopsis. For all the rescue experiment, the *SUN2* coding sequence  
340 was amplified from the moss cDNA library (full-length, truncation, mutant) and ligated  
341 into the pENTR/D-TOPO vector containing the in-frame linker, Cerulean-coding  
342 sequence, followed by the Gateway LR reaction (Invitrogen) into a vector containing the  
343 *P. patens EF1a* promoter, nourseothricin resistance cassette, and 1-kb sequences  
344 homologous to the *PTAI* locus.

345

### 346 **Moss growth assay**

347 The 5–7-day-old sonicated protonemata with similar sizes were inoculated to the BCDAT  
348 plate. Two plates each containing 25 pieces of inoculated protonemata were made for  
349 each strain. After 20 d of incubation under the continuous light, images of overall moss  
350 or gametophores were acquired using a C-765 Ultra Zoom digital camera (Olympus) or  
351 SMZ800N, respectively.

352

### 353 **Microscopy**

354 Time-lapse microscopy was performed as described by (Nakaoka et al., 2012). Briefly,  
355 in the long-term time-lapse imaging experiments for the observation of protonemal cells,  
356 the protonemata were cultured on thin layers of BCD agarose in 6-well glass-bottom  
357 dishes for 5–7 d. Wide-field, epifluorescence images were acquired with a Nikon Ti  
358 microscope (10× 0.45 NA lens, Zyla 4.2P CMOS camera (Andor), Nikon Intensilight  
359 Epi-fluorescence Illuminator) at intervals of 1 min (no z-stacks). For high-resolution  
360 imaging, protonemata were inoculated onto the agar pad in a 35 mm glass-bottom dish,  
361 followed by culturing for 5–7 d. Confocal imaging was performed with a Nikon Ti  
362 microscope attached to a CSU-X1 spinning-disc confocal scanner unit (Yokogawa),  
363 EMCCD camera (ImagEM, Hamamatsu), and three laser lines (561, and 488 nm). 100×  
364 1.45 NA lens was used for most experiments related to protonemal and gametophore cell  
365 divisions. For the quantification of gametophore division plane angle, 40× 1.30 NA lens  
366 was used. To induce the gametophore cells, protonemal cells were treated with 2-



367 isopentenyladenine (2iP) for 5–10 min, 20–22 h before imaging (Kosetsu et al., 2017).  
368 Stock solution of oryzalin, latrunculin A, FM4-64 and 2iP in DMSO was diluted with  
369 distilled water to working concentrations of 10  $\mu$ M oryzalin, 25  $\mu$ M latrunculin A, 10  $\mu$ M  
370 FM4-64 and 1  $\mu$ M 2iP. Prior to drug addition, the protonemal tissue on the agarose pad  
371 was preincubated in water for 1 h for absorption. After water removal, 0.3 mL of the drug  
372 solution was added, and image acquisition was started 5–10 min later. DMSO was used  
373 as a control. Imaging was performed at 22–25 °C in the dark.

374

### 375 **Image data analysis**

376 All raw data processing and measurements were performed using the Fiji software.

377

378 *Moss growth on the culture plate.* The images of the moss on the culture plate were  
379 outlined automatically, and the area was measured using Fiji.

380

381 *Mitotic duration.* For caulonemal apical cells, time-lapse images were obtained every 1  
382 min using an epifluorescence (wide-field) microscope and a 10 $\times$  0.45 NA lens, and the  
383 duration between NEBD and the anaphase onset was measured.

384

385 *Nuclear velocity.* For caulonemal apical cells, time-lapse images were obtained every 1  
386 min using an epifluorescence (wide-field) microscope and a 10 $\times$  0.45 NA lens. A  
387 kymograph of chromosomes was generated along the dividing cell. To obtain nuclear  
388 velocity, the inclination of the nuclear signal in the subapical cell 145 min after anaphase  
389 onset was manually measured with Fiji.

390

391 *Nuclear circularity.* For caulonemal apical and subapical cells in interphase, the images  
392 of the nuclei were obtained with z-stacks at 1  $\mu$ m intervals for a range of 9  $\mu$ m using a  
393 spinning-disc confocal microscope and a 100 $\times$  1.45 NA lens. The z-stack images were  
394 processed by maximum z-projection. The nuclei were outlined automatically, and the  
395 circularity of the nucleus was measured with Fiji. For caulonemal apical cells in mitotic  
396 prophase, time-lapse images were obtained every 2 min with z-stacks at 1  $\mu$ m intervals  
397 for a range of 7  $\mu$ m using a spinning-disc confocal microscope and a 100 $\times$  1.45 NA lens.  
398 The circularity of the nucleus at the best focal plane was measured manually with Fiji.

399

400 *Chromosome dynamics during cell division.* For caulonemal apical cells, time-lapse  
401 images were obtained every 10 s with z-stacks at 2  $\mu$ m intervals for a range of 4  $\mu$ m using  
402 a spinning-disc confocal microscope and a 100 $\times$  1.45 NA lens. The best focal plane was  
403 selected for analysis. A kymograph of chromosome mass was generated along the spindle  
404 pole-to-pole axis. For quantification, the chromosome mass on the kymograph was  
405 manually outlined with Fiji and, for each timepoint, the distance from the basal edge of  
406 the nucleus (set at 11 min before NEBD) was calculated.

407

408 *Distance between the nucleolus and nuclear edge.* For caulonemal apical cells, time-lapse  
409 images were obtained every 10 s with z-stacks at 2  $\mu$ m intervals for a range of 4  $\mu$ m using

410 a spinning-disc confocal microscope and a 100× 1.45 NA lens. The best focal plane in  
411 prophase was selected for analysis. The radius of the nucleus, the distance from the  
412 nuclear apical edge to the nucleolus centre, and the diameter of the nucleus were  
413 measured manually with Fiji.

414

415 *Distribution of SUN2-mNG along the nuclear membrane.* For caulonemal apical cells,  
416 time-lapse images were obtained every 30 s with z-stacks at 1.5 µm intervals for a range  
417 of 3 µm using a spinning-disc confocal microscope and a 100× 1.45 NA lens. The best  
418 focal plane was selected for analysis. The intensity of SUN2-mNG and the microtubules  
419 along the nucleus was measured just before NEBD, and the background intensity of each  
420 image was subtracted. The intensity of each pixel on the drawn line (3-pixel width) was  
421 divided by the mean intensity of the entire length of the line to get the relative intensity.  
422 The cells were divided into 10 sections, and the average relative intensity of each section  
423 is displayed.

424

425 *Gametosome position.* For gametophore initial cells, time-lapse images were obtained  
426 every 30 s with z-stacks at 1 µm intervals for a range of 6 µm using a spinning-disc  
427 confocal microscope and a 100× 1.45 NA lens. The best focal plane was selected for  
428 analysis. The relative angle between the line connecting the nuclear centre to gametosome  
429 centre and the long axis of the cell was calculated.

430

431 *Spindle orientation.* For gametophore initial cells, time-lapse images were obtained every  
432 30 s with z-stacks at 3 µm intervals for a range of 12 µm using a spinning-disc confocal  
433 microscope and a 100× 1.45 NA lens. The best focal plane was selected for analysis. The  
434 angle between the long axis of the spindle and the long axis of the cell was calculated.

435

436 *Division plane orientation.* Gametophore initial cells were stained by FM4-64 prior to the  
437 imaging. The images of gametophore initial cells were obtained with z-stacks at 2.5 µm  
438 intervals for a range of 25 µm using a spinning-disc confocal microscope and a 40× 1.30  
439 NA lens. The z-stack images were processed by maximum z-projection with Fiji, and the  
440 relative angle between the division plane and the long axis of the cell was calculated.

441

## 442 **Statistical analysis**

443 The Shapiro-Wilk test was used for all samples to check for normality. If the sample was  
444 assumed to be normally distributed, the F-test (two groups) or Bartlett's test (multiple  
445 groups) was conducted to test homoscedasticity. If the samples had a normal distribution  
446 and equal variance, Student's *t*-test (two groups) or Tukey's multiple comparison test  
447 (multiple groups) was used. If the samples had a normal distribution but not equal  
448 variance, Welch's two-sample *t*-test (two groups) or the Games-Howell test (multiple  
449 groups) was used. If the samples did not have a normal distribution, Mann-Whitney U test  
450 (two groups) or Steel-Dwass test (multiple groups) was used. All statistical analyses were  
451 performed using R software. Obtained P values are denoted as follows: \*, P < 0.05; \*\*, P  
452 < 0.01; \*\*\*, P < 0.001; and \*\*\*\*, P < 0.0001. Data from multiple experiments were  
453 combined because of insufficient sample numbers in a single experiment unless otherwise

454 stated.

455

#### 456 **Accession numbers**

457 The gene sequences used in this study are available in Phytozome under the following  
458 accession numbers: *SUN1* (Pp3c7\_4170), *SUN2* (Pp3c11\_22530), *SUN3* (Pp3c21\_2240),  
459 *SUN4* (Pp3c18\_19540).

460

#### 461 **Acknowledgements**

462 We are grateful to Maya Hakozaiki for providing moss lines; Chiemi Koketsu and Rie  
463 Inaba for media preparation. This work was funded by the Japan Society for the  
464 Promotion of Science KAKENHI (18KK0202, 22H04717, and 22H02644 to GG). MWY  
465 is a recipient of the Japan Society for the Promotion of Science pre-doctoral fellowship.  
466 The authors declare no competing interests.

467

#### 468 **References**

469

- 470 Almonacid, M., M.E. Terret, and M.H. Verlhac. 2019. Nuclear positioning as an integrator  
471 of cell fate. *Curr Opin Cell Biol.* 56:122-129.
- 472 Ashton, N.W., and D.J. Cove. 1977. The isolation and preliminary characterisation of  
473 auxotrophic and analogue resistant mutants of the moss, *Physcomitrella patens*.  
474 *Molecular and General Genetics MGG.* 154:87-95.
- 475 Buschmann, H., M. Holtmannspotter, A. Borchers, M.T. O'Donoghue, and S. Zachgo.  
476 2016. Microtubule dynamics of the centrosome-like polar organizers from the  
477 basal land plant *Marchantia polymorpha*. *New Phytol.* 209:999-1013.
- 478 Buschmann, H., and S. Zachgo. 2016. The Evolution of Cell Division: From Streptophyte  
479 Algae to Land Plants. *Trends Plant Sci.* 21:872-883.
- 480 Fernandez-Alvarez, A., C. Bez, E.T. O'Toole, M. Morphey, and J.P. Cooper. 2016.  
481 Mitotic Nuclear Envelope Breakdown and Spindle Nucleation Are Controlled by  
482 Interphase Contacts between Centromeres and the Nuclear Envelope. *Dev Cell.*  
483 39:544-559.
- 484 Graumann, K., E. Vanrobays, S. Tutois, A.V. Probst, D.E. Evans, and C. Tatout. 2014.  
485 Characterization of two distinct subfamilies of SUN-domain proteins in  
486 *Arabidopsis* and their interactions with the novel KASH-domain protein AtTIK.  
487 *J Exp Bot.* 65:6499-6512.
- 488 Gundersen, G.G., and H.J. Worman. 2013. Nuclear positioning. *Cell.* 152:1376-1389.
- 489 Hagan, I., and M. Yanagida. 1995. The product of the spindle formation gene *sad1+*  
490 associates with the fission yeast spindle pole body and is essential for viability. *J*  
491 *Cell Biol.* 129:1033-1047.
- 492 Harrison, C.J., A.H. Roeder, E.M. Meyerowitz, and J.A. Langdale. 2009. Local cues and  
493 asymmetric cell divisions underpin body plan transitions in the moss  
494 *Physcomitrella patens*. *Curr Biol.* 19:461-471.
- 495 Jahed, Z., N. Domkam, J. Ornowski, G. Yerima, and M.R.K. Mofrad. 2021. Molecular  
496 models of LINC complex assembly at the nuclear envelope. *J Cell Sci.* 134.
- 497 Jaspersen, S.L., A.E. Martin, G. Glazko, T.H. Giddings, Jr., G. Morgan, A. Mushegian,  
498 and M. Winey. 2006. The Sad1-UNC-84 homology domain in Mps3 interacts with  
499 Mps2 to connect the spindle pole body with the nuclear envelope. *J Cell Biol.*

- 500 174:665-675.
- 501 Kofuji, R., and M. Hasebe. 2014. Eight types of stem cells in the life cycle of the moss  
502 *Physcomitrella patens*. *Curr Opin Plant Biol.* 17:13-21.
- 503 Kosetsu, K., T. Murata, M. Yamada, M. Nishina, J. Boruc, M. Hasebe, D. Van Damme,  
504 and G. Goshima. 2017. Cytoplasmic MTOCs control spindle orientation for  
505 asymmetric cell division in plants. *Proc Natl Acad Sci U S A.* 114:E8847-E8854.
- 506 Kozgunova, E., M. Nishina, and G. Goshima. 2019. Kinetochore protein depletion  
507 underlies cytokinesis failure and somatic polyploidization in the moss  
508 *Physcomitrella patens*. *Elife.* 8.
- 509 Kozgunova, E., M.W. Yoshida, R. Reski, and G. Goshima. 2022. Spindle motility skews  
510 division site determination during asymmetric cell division in *Physcomitrella*. *Nat*  
511 *Commun.* 13:2488.
- 512 Liu, B., and Y.J. Lee. 2022. Spindle Assembly and Mitosis in Plants. *Annu Rev Plant Biol.*  
513 73:227-254.
- 514 Lloyd, C., and J. Chan. 2006. Not so divided: the common basis of plant and animal cell  
515 division. *Nat Rev Mol Cell Biol.* 7:147-152.
- 516 Lopez-Obando, M., B. Hoffmann, C. Gery, A. Guyon-Debast, E. Teoule, C. Rameau, S.  
517 Bonhomme, and F. Nogue. 2016. Simple and Efficient Targeting of Multiple  
518 Genes Through CRISPR-Cas9 in *Physcomitrella patens*. *G3 (Bethesda).* 6:3647-  
519 3653.
- 520 Meier, I. 2016. LINCing the eukaryotic tree of life - towards a broad evolutionary  
521 comparison of nucleocytoplasmic bridging complexes. *J Cell Sci.* 129:3523-3531.
- 522 Meier, I., E.J. Richards, and D.E. Evans. 2017. Cell Biology of the Plant Nucleus. *Annu*  
523 *Rev Plant Biol.* 68:139-172.
- 524 Meinke, P., E. Mattioli, F. Haque, S. Antoku, M. Columbaro, K.R. Straatman, H.J.  
525 Worman, G.G. Gundersen, G. Lattanzi, M. Wehnert, and S. Shackleton. 2014.  
526 Muscular dystrophy-associated SUN1 and SUN2 variants disrupt nuclear-  
527 cytoskeletal connections and myonuclear organization. *PLoS Genet.*  
528 10:e1004605.
- 529 Mejat, A., and T. Misteli. 2010. LINC complexes in health and disease. *Nucleus.* 1:40-52.
- 530 Nakaoka, Y., T. Miki, R. Fujioka, R. Uehara, A. Tomioka, C. Obuse, M. Kubo, Y.  
531 Hiwatashi, and G. Goshima. 2012. An inducible RNA interference system in  
532 *Physcomitrella patens* reveals a dominant role of augmin in phragmoplast  
533 microtubule generation. *Plant Cell.* 24:1478-1493.
- 534 Naramoto, S., Y. Hata, T. Fujita, and J. Kyoizuka. 2022. The bryophytes *Physcomitrium*  
535 *patens* and *Marchantia polymorpha* as model systems for studying evolutionary  
536 cell and developmental biology in plants. *Plant Cell.* 34:228-246.
- 537 Oda, Y., and H. Fukuda. 2011. Dynamics of Arabidopsis SUN proteins during mitosis and  
538 their involvement in nuclear shaping. *Plant J.* 66:629-641.
- 539 Smirnova, E.A., and A.S. Bajer. 1998. Early stages of spindle formation and  
540 independence of chromosome and microtubule cycles in *Haemanthus endosperm*.  
541 *Cell Motil Cytoskeleton.* 40:22-37.
- 542 Ta, K.N., M.W. Yoshida, T. Tezuka, S. Shimizu-Sato, M. Nosaka-Takahashi, A. Toyoda,  
543 T. Suzuki, G. Goshima, and Y. Sato. 2023. Control of Plant Cell Growth and  
544 Proliferation by MO25A, a Conserved Major Component of the Mammalian  
545 Sterile 20-Like Kinase Pathway. *Plant Cell Physiol.* 64:336-351.
- 546 Tamura, K., K. Iwabuchi, Y. Fukao, M. Kondo, K. Okamoto, H. Ueda, M. Nishimura, and

- 547 I. Hara-Nishimura. 2013. Myosin XI-i links the nuclear membrane to the  
548 cytoskeleton to control nuclear movement and shape in Arabidopsis. *Curr Biol.*  
549 23:1776-1781.
- 550 Tatout, C., D.E. Evans, E. Vanrobays, A.V. Probst, and K. Graumann. 2014. The plant  
551 LINC complex at the nuclear envelope. *Chromosome Res.* 22:241-252.
- 552 Turgay, Y., L. Champion, C. Balazs, M. Held, A. Toso, D.W. Gerlich, P. Meraldi, and U.  
553 Kutay. 2014. SUN proteins facilitate the removal of membranes from chromatin  
554 during nuclear envelope breakdown. *J Cell Biol.* 204:1099-1109.
- 555 Yamada, M., and G. Goshima. 2018. The KCH Kinesin Drives Nuclear Transport and  
556 Cytoskeletal Coalescence to Promote Tip Cell Growth in *Physcomitrella patens*.  
557 *Plant Cell.* 30:1496-1510.
- 558 Yamada, M., T. Miki, and G. Goshima. 2016. Imaging Mitosis in the Moss *Physcomitrella*  
559 *patens*. *Methods Mol Biol.* 1413:263-282.
- 560 Yi, P., and G. Goshima. 2018. Microtubule nucleation and organization without  
561 centrosomes. *Curr Opin Plant Biol.* 46:1-7.
- 562 Yi, P., and G. Goshima. 2020. Transient cotransformation of CRISPR/Cas9 and  
563 oligonucleotide templates enables efficient editing of target loci in *Physcomitrella*  
564 *patens*. *Plant Biotechnol J.* 18:599-601.
- 565 Yoshida, M.W., M. Hakoziaki, and G. Goshima. 2023. Armadillo repeat-containing  
566 kinesin represents the versatile plus-end-directed transporter in *Physcomitrella*.  
567 *bioRxiv*.
- 568 Zhou, X., K. Graumann, D.E. Evans, and I. Meier. 2012. Novel plant SUN-KASH bridges  
569 are involved in RanGAP anchoring and nuclear shape determination. *J Cell Biol.*  
570 196:203-211.

571

## 572 **Movie legends**

573

### 574 **Movie 1. Defective nuclear migration and mitotic delay in the *sun2* KO line**

575 Time-lapse video of protonemal cells expressing GFP-tubulin (green) and histone H2B-  
576 mCherry (magenta). Movies were acquired using an epifluorescence (wide-field)  
577 microscope in a single focal plane (10× 0.45 lens). Bar, 50 μm.

578

### 579 **Movie 2. Abnormal MTOC position in prophase and delayed chromosome 580 congression in the *sun2* KO line**

581 Time-lapse video of microtubules (GFP-tubulin, green) and chromosomes (histone H2B-  
582 mCherry, magenta) in protonemal apical cells. Movies were acquired using a spinning-  
583 disc confocal microscope. Bar, 5 μm.

584

## 585 **Supplemental tables**

586

587 **Table S1. Moss lines used in this study**

588 **Table S2. Plasmids used in this study**

589 **Table S3. Primers used for plasmid construction and sequencing**

590 **Table S4. Primers used for genotyping PCR**

## Figure 1

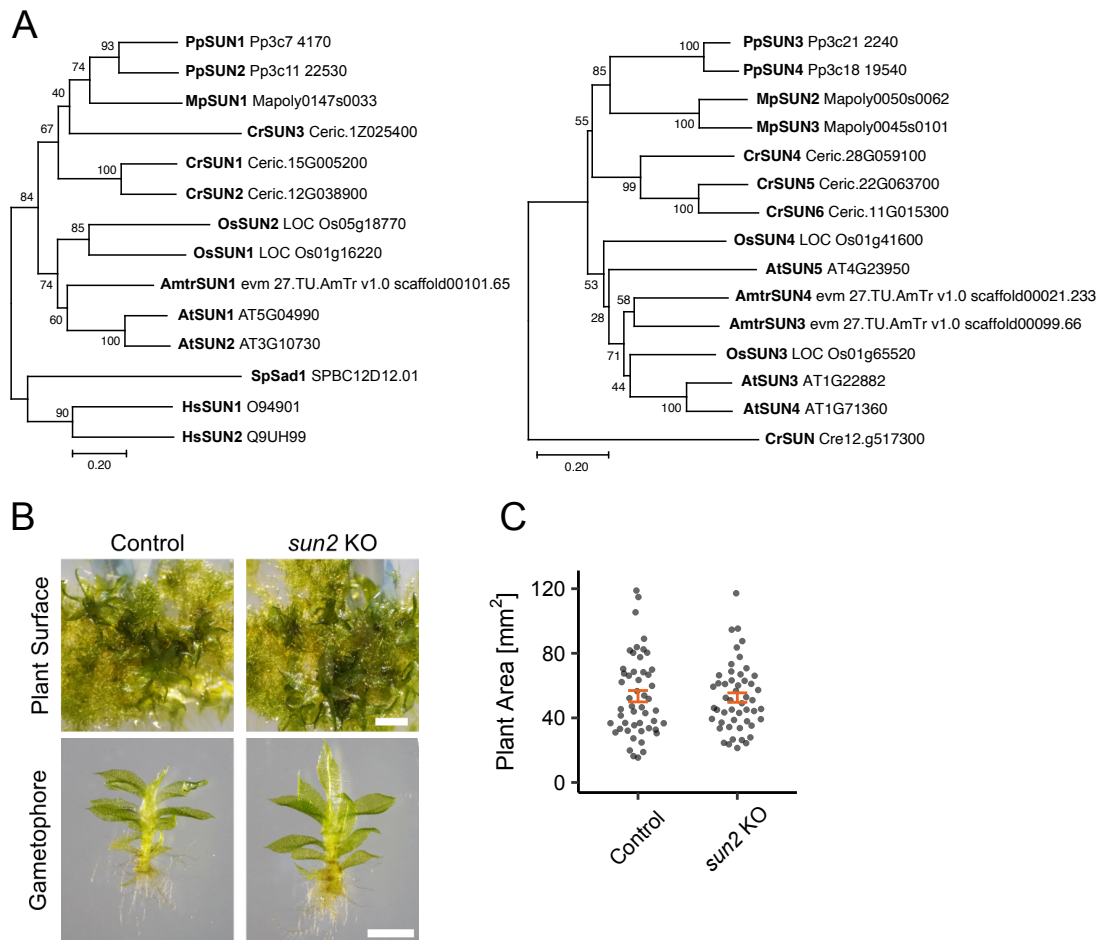

### Figure 1. Normal development of *Physcomitrium patens* *sun2* knockout line

- (A) Phylogenetic analysis of Cter-SUN genes (left) and mid-SUN genes (right): moss *Physcomitrium patens* (Pp), *Brassica Arabidopsis thaliana* (At), rice *Oryza sativa* (Os), green alga *Chlamydomonas reinhardtii* (Cr), *Amborella trichopoda* (Amtr), liverwort *Marchantia polymorpha* (Mp), yeast *Schizosaccharomyces pombe* (Sp), and *Homo sapiens* (Hs). Amino acid sequences were collected from the database (accession numbers are indicated on the right), aligned with MAFFT, and gaps were deleted. The phylogenetic tree was constructed using the neighbour-joining method and MEGAX software, and its reliability was assessed using 1,000 bootstrapping trials. The bar indicates 0.2 amino acid substitutions per site.
- (B) (Top) Culture plate containing 20-day-old moss that grew from a piece of protonemata. (Bottom) Isolated gametophores and rhizoids. Control; GFP- $\alpha$ -tubulin/Histone-mCherry line. Bars, 1 mm.
- (C) Plant area comparison. The moss lines used in this analysis are the same as those used in (B). The mean area (mm<sup>2</sup>) was  $53.4 \pm 3.53$  (control,  $\pm$ SEM,  $n = 50$ ) and  $52.6 \pm 2.93$  (*sun2* KO,  $\pm$ SEM,  $n = 50$ ).  $P = 0.9259$  based on the two-sided Mann–Whitney U test.

## Figure 2

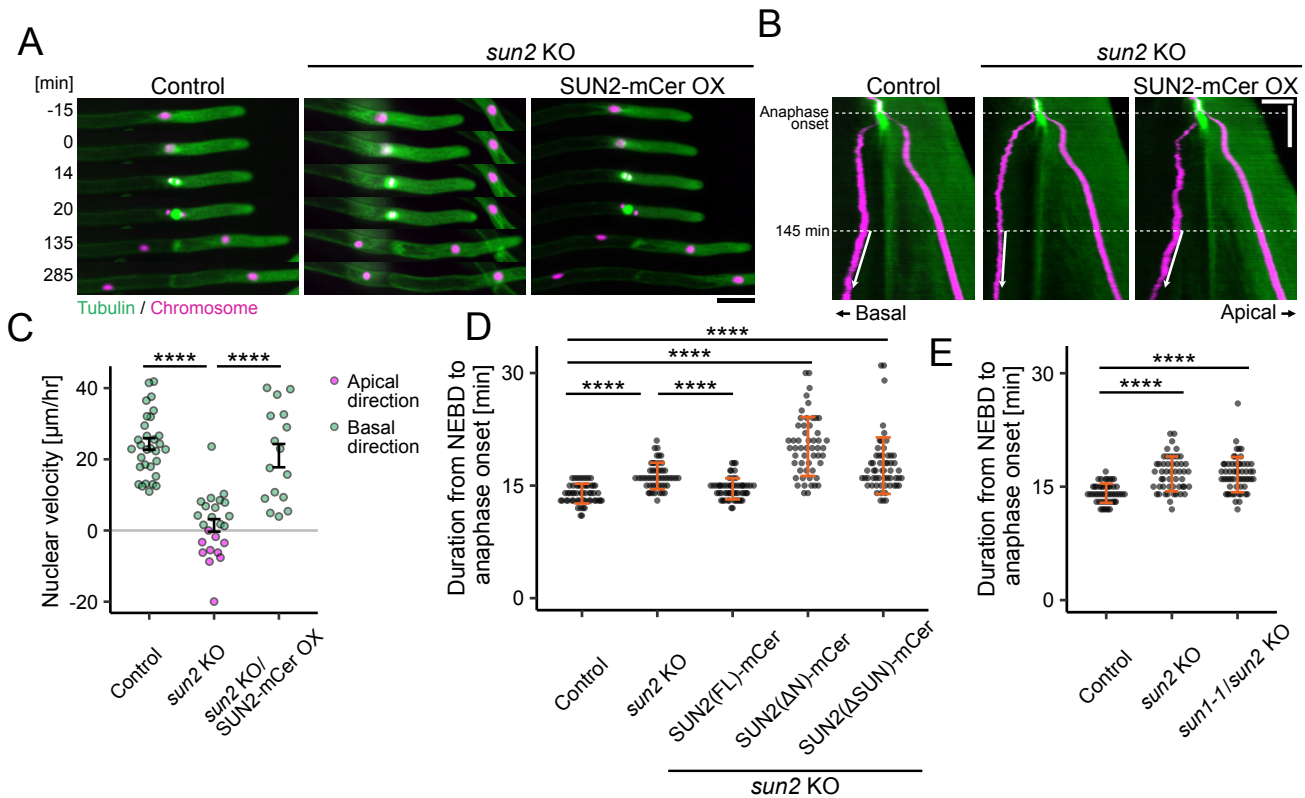

### Figure 2. Defective nuclear migration and mitotic delay in the *sun2* KO line

- (A) Nucleus dynamics in protonemal apical and subapical cells. NEBD was set to 0 min. Images were acquired with epifluorescence (wide-field) microscopy using a 10× lens. Bar, 50 µm.
- (B) Kymographs showing nuclear movement after cell division. The movement after 145 min is indicated by arrows. Bars, 50 µm (horizontal) and 50 min (vertical).
- (C) Nuclear movement rate in subapical cells 145 min after anaphase onset. The apical and basal movements were counted as negative and positive values, respectively. OX stands for overexpression. Mean ± SEM (min): 24.3 ± 1.63 (n = 32), 1.44 ± 1.76 (n = 24), 21.0 ± 3.27 (n = 16). P-values based on two-sided Tukey's multiple comparison test: P < 0.0000001 (control vs. *sun2* KO) and P = 0.0000002 (*sun2* KO vs. *sun2* KO/SUN2 [full-length]-mCerulean).
- (D) Mitotic duration. Mean ± SEM (from left to right): 13.9 ± 0.178 min (n = 55), 16.3 ± 0.249 min (n = 50), 14.5 ± 0.190 min (n = 55), 20.2 ± 0.540 min (n = 53), and 17.6 ± 0.498 min (n = 57). P-values based on two-sided Steel–Dwass test: P < 0.00001 (control vs. *sun2* KO), P = 0.0001 (*sun2* KO vs. *sun2* KO/SUN2 [full-length]-mCerulean), P < 0.00001 (control vs. *sun2* KO/ SUN2DN-mCerulean), and P < 0.00001 (control vs. *sun2* KO/ SUN2DSUN-mCerulean).
- (E) Mitotic duration of *sun1-1/sun2* KO. Mean ± SEM (from left to right): 14.1 ± 0.181 min (n = 50), 16.7 ± 0.322 min (n = 51), 16.6 ± 0.308 min (n = 57). P-values based on two-sided Steel–Dwass test: P = 0.9543 (*sun2* KO vs. *sun1-1/sun2* KO).

## Figure 3

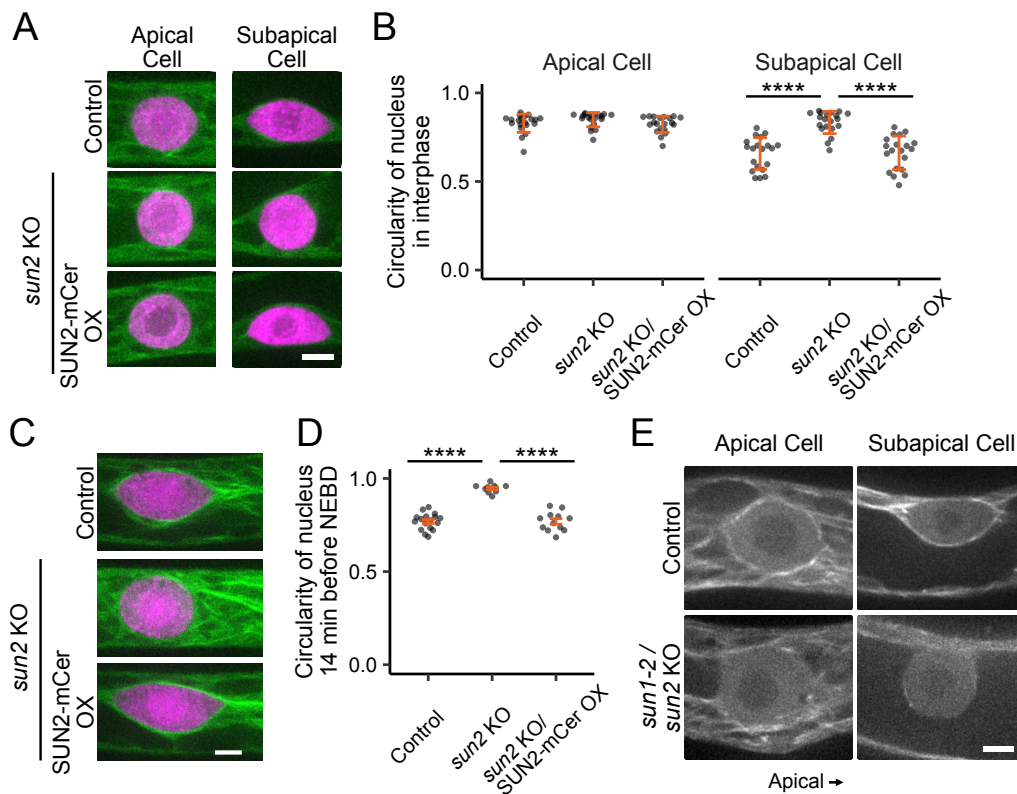

### Figure 3. Nucleus deformation in the *sun2* KO line

- (A) Shape of the nucleus in interphase. Green; microtubules. Magenta; chromosomes.
- (B) Circularity of the nucleus in interphase. Mean  $\pm$  SEM (from left to right): Apical cells,  $0.829 \pm 0.0115$  ( $n = 20$ ),  $0.849 \pm 0.00904$  ( $n = 20$ ),  $0.823 \pm 0.0103$  ( $n = 20$ ), Subapical cells,  $0.658 \pm 0.0201$  ( $n = 20$ ),  $0.833 \pm 0.0141$  ( $n = 20$ ),  $0.662 \pm 0.0211$  ( $n = 20$ ). P-values based on two-sided Steel–Dwass test;  $P < 0.00001$  (subapical cells: control vs. *sun2* KO),  $P < 0.00001$  (subapical cells: *sun2* KO vs. *sun2* KO/SUN2 [full-length]-mCerulean).
- (C) Shape of the prophase nucleus 14 min before NEBD. Green; microtubules. Magenta; chromosomes.
- (D) Circularity of the nucleus 14 min before NEBD. Mean  $\pm$  SEM (from left to right):  $0.769 \pm 0.0107$  ( $n = 17$ ),  $0.947 \pm 0.00711$  ( $n = 10$ ),  $0.769 \pm 0.0148$  ( $n = 12$ ). P-values based on two-sided Tukey's multiple comparison test;  $P < 0.0000001$  (subapical cells: control vs. *sun2* KO),  $P < 0.0000001$  (subapical cells: *sun2* KO vs. *sun2* KO/SUN2 [full-length]-mCerulean).
- (E) Microtubules around the nucleus in protonemal cells in interphase Control; mCherry- $\alpha$ -tubulin line. Bars, 5  $\mu$ m.



## Figure 4

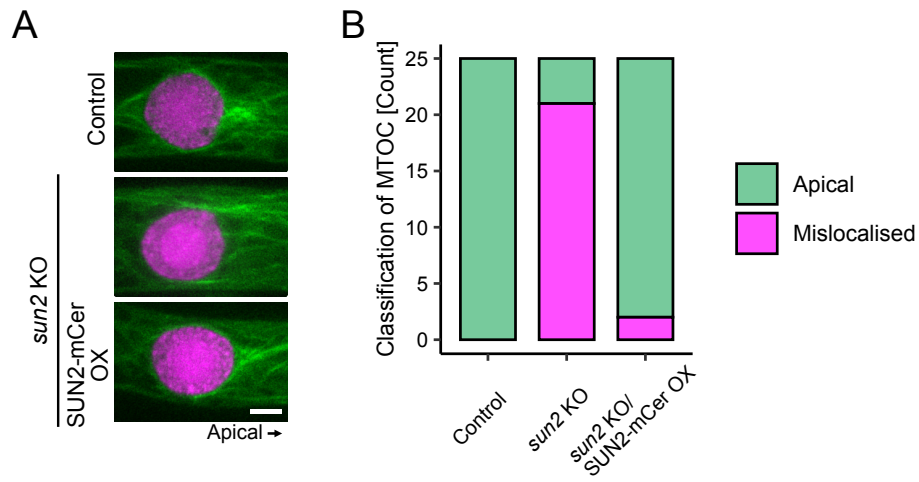

**Figure 4. Abnormal MTOC position in prophase in the *sun2* KO line**  
(A) Apical cap MTOC right before NEBD. Green; microtubules. Magenta; chromosomes. Bar, 5  $\mu$ m.  
(B) Frequency of apical NE association of MTOCs (n = 25 each).

## Figure 5

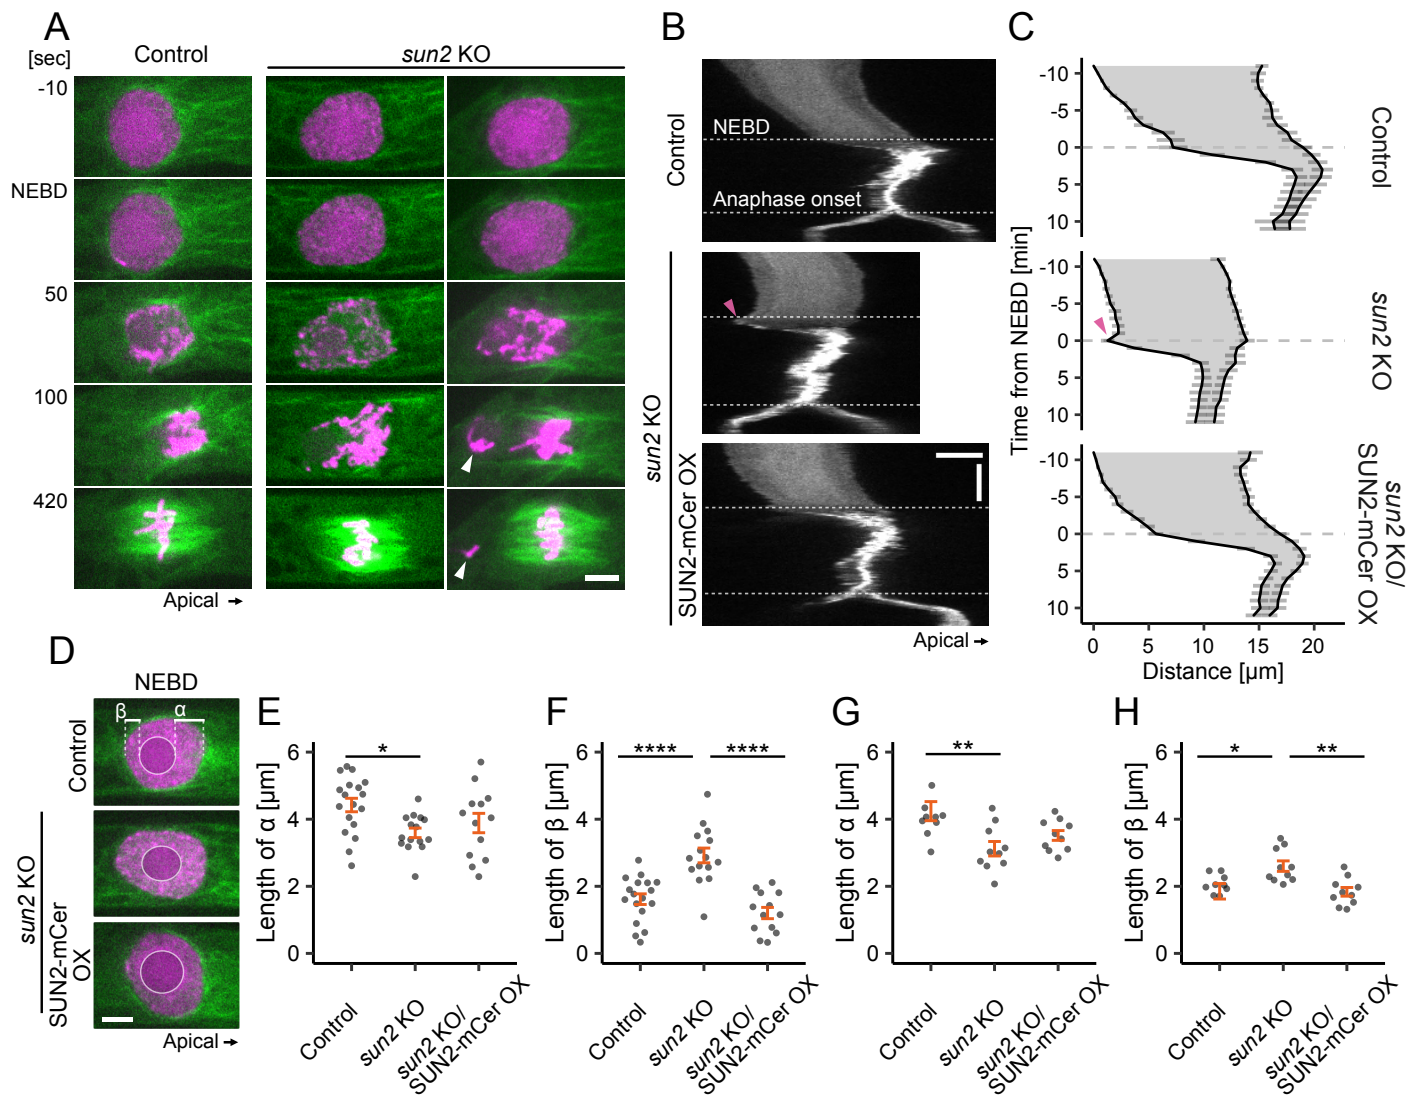

**Figure 5. Delayed chromosome congression in the *sun2* KO line**

- (A) Spindle assembly and chromosome congression. Two examples are shown for *sun2* KO. The arrowhead indicates a misaligned chromosome. NEBD was set to 0 sec. Green; microtubules. Magenta; chromosomes. Bar, 5  $\mu$ m.
- (B) Kymographs showing the dynamics of chromosome mass. Arrowhead indicates characteristic basal motility upon NEBD observed in *sun2* KO. Bar, 5  $\mu$ m (horizontal) and 5 min (vertical).
- (C) Quantification of nuclear and chromosomal dynamics (mean  $\pm$  SEM). The contour of Histone-mCherry of the kymograph signal was averaged. From top to bottom,  $n = 11, 7, 10$ . Arrowhead represents characteristic basal motility upon NEBD in *sun2* KO.
- (D) Position of the nucleolus (circled) at the NEBD. The distance between the nucleolus and apical edge of the nucleus ( $\alpha$ ) or basal edge of the nucleus ( $\beta$ ) was quantified in (E) and (F), respectively. Bar, 5  $\mu$ m.
- (E) Quantification of the length  $\alpha$  in (D) at NEBD. Mean  $\pm$  SEM (from left to right):  $4.42 \pm 0.201$  ( $n = 18$ ),  $3.59 \pm 0.142$  ( $n = 15$ ),  $3.89 \pm 0.289$  ( $n = 13$ ). P-values based on two-sided Tukey's multiple comparison test;  $P = 0.0175847$  (subapical cells: control vs. *sun2* KO),  $P = 0.6239412$  (subapical cells: *sun2* KO vs. *sun2* KO/SUN2 [full-length]-mCerulean).
- (F) Quantification of the length  $\beta$  in (D) at NEBD. Mean  $\pm$  SEM (from left to right):  $1.62 \pm 0.159$  ( $n = 18$ ),  $2.92 \pm 0.220$  ( $n = 15$ ),  $1.20 \pm 0.168$  ( $n = 13$ ). P-values based on two-sided Tukey's multiple comparison test;  $P = 0.0000163$  (subapical cells: control vs. *sun2* KO),  $P = 0.0000004$  (subapical cells: *sun2* KO vs. *sun2* KO/SUN2 [full-length]-mCerulean).
- (G) Quantification of the length  $\alpha$  in (D) right before NEBD. Mean  $\pm$  SEM (from left to right):  $4.24 \pm 0.284$  ( $n = 10$ ),  $3.12 \pm 0.216$  ( $n = 10$ ),  $3.52 \pm 0.146$  ( $n = 10$ ). P-values based on two-sided Tukey's multiple comparison test;  $P = 0.0038877$  (subapical cells: control vs. *sun2* KO),  $P = 0.4316128$  (subapical cells: *sun2* KO vs. *sun2* KO/SUN2 [full-length]-mCerulean).
- (H) Quantification of the length  $\beta$  in (D) right before NEBD. Mean  $\pm$  SEM (from left to right):  $1.85 \pm 0.231$  ( $n = 10$ ),  $2.60 \pm 0.156$  ( $n = 10$ ),  $1.84 \pm 0.129$  ( $n = 10$ ). P-values based on two-sided Steel-Dwass test;  $P = 0.0116$  (subapical cells: control vs. *sun2* KO),  $P = 0.0076$  (subapical cells: *sun2* KO vs. *sun2* KO/SUN2 [full-length]-mCerulean).

## Figure 6

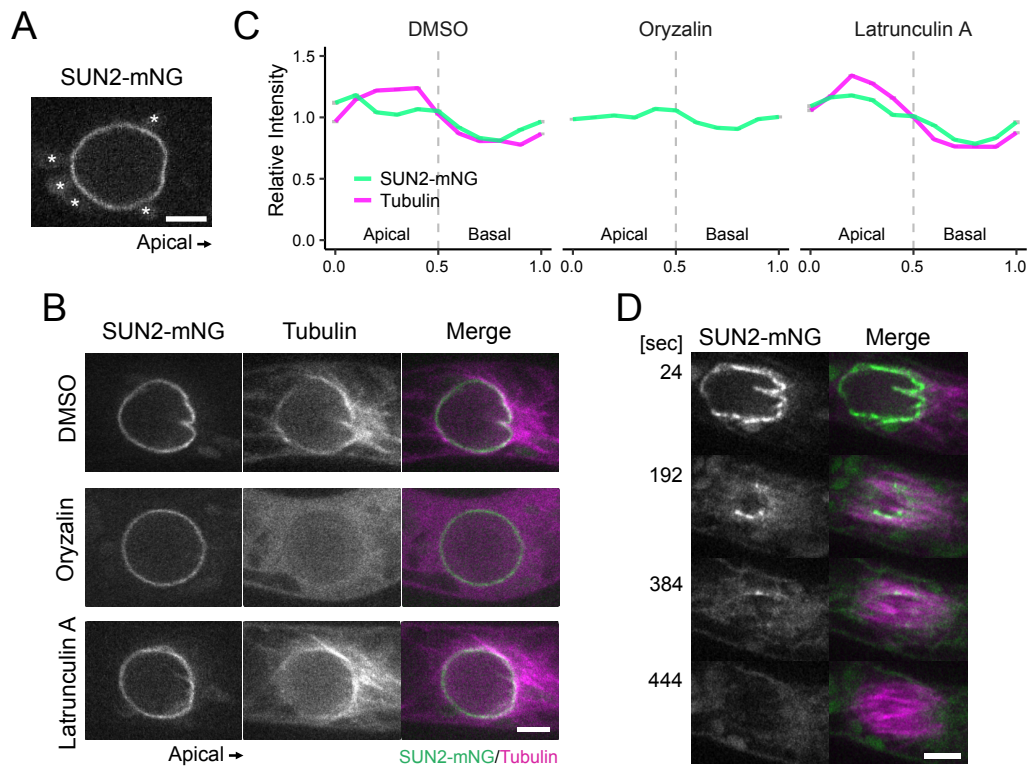

### Figure 6. Localisation of SUN2 in early mitosis

- (A) SUN2-mNeonGreen (mNG) localisation in interphase. Asterisks indicate autofluorescent chloroplasts.
- (B) SUN2 localisation in late prophase with or without cytoskeleton drugs.
- (C) Quantification of the SUN2-mNG distribution along the NE. Apical enrichment was disrupted by oryzalin treatment but not by Latrunculin A. From left to right, n = 16, 14, 15 cells.
- (D) SUN2 localisation during spindle assembly. Time 0; NEBD. Bars, 5 μm.

## Figure 7

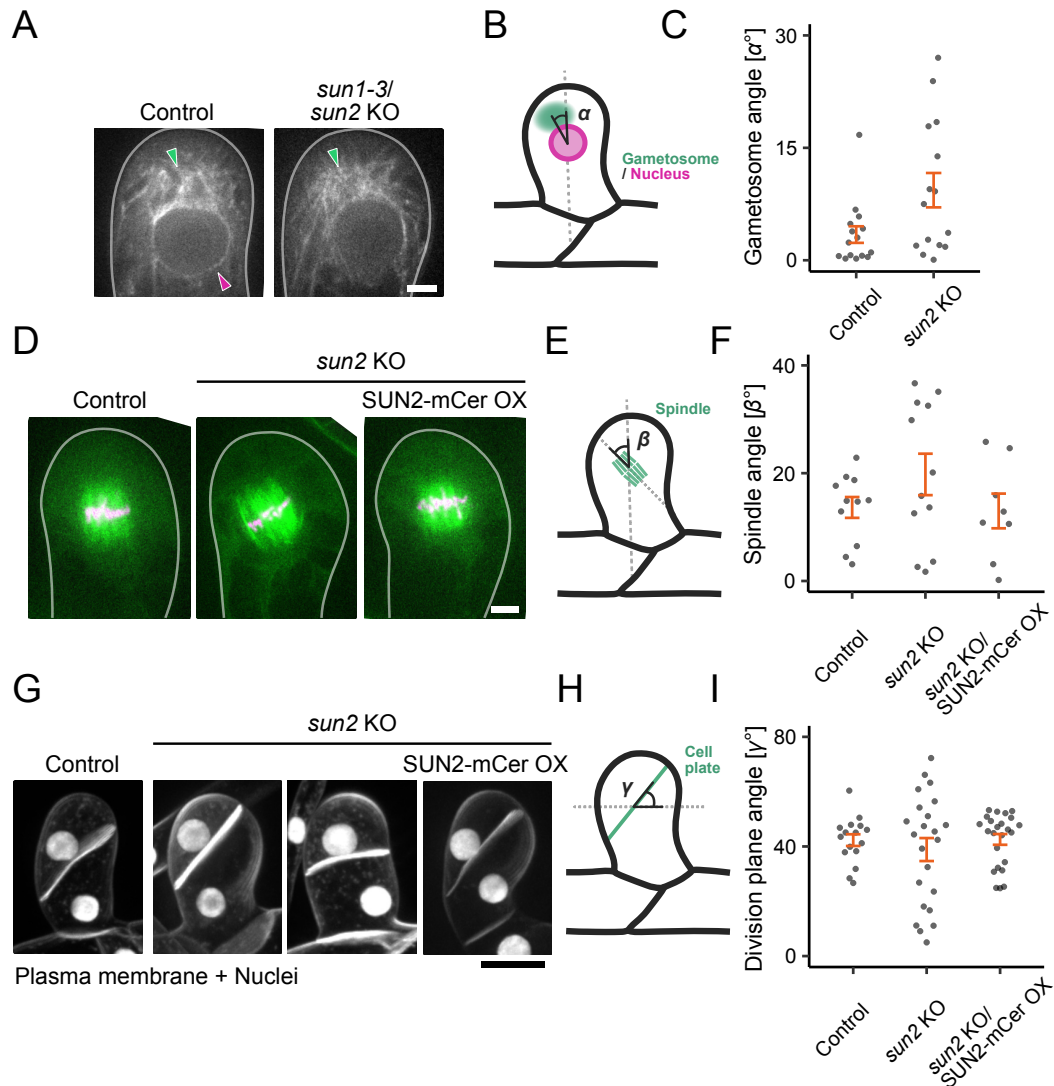

### Figure 7. Division plane misorientation in gametophore initial cells of the *sun2* KO line

- (A) Microtubule clouds called ‘gametosome’ (green arrowheads) appeared in the apical cytoplasm in prophase in the gametophore initial cell. The magenta arrowhead indicates accumulation of microtubules around the basal NE. Control; mCherry- $\alpha$ -tubulin line. Bar, 5  $\mu$ m.
- (B) Scheme of the angle ( $\alpha$ ) measurements. Green; gametosome. Magenta; nucleus.
- (C) Quantification of the relative positions of gametosomes in cells. The angle  $\alpha$  defined in (B) was measured. Mean  $\pm$  SEM (from left to right):  $3.43 \pm 1.11$  (n = 15),  $9.35 \pm 2.29$  (n = 15). P-values based on two-sided Mann–Whitney U test: P = 0.05022 (control vs. *sun1-3/sun2* KO).
- (D) Metaphase spindles in the gametophore initial cell. Green; microtubules. Magenta; chromosomes. Bar, 5  $\mu$ m.
- (E) Spindle angle ( $\beta$ ) measurement scheme.
- (F) Quantification of metaphase spindle orientation. The angle  $\beta$  defined in (E) was measured. Mean  $\pm$  SEM (from left to right):  $13.6 \pm 1.93$  (n = 11),  $19.7 \pm 3.84$  (n = 12),  $13.0 \pm 3.21$  (n = 8). P-values based on two-sided Steel–Dwass test: P = 0.8454 (control vs. *sun2* KO), P = 0.6253 (subapical cells: *sun2* KO vs. *sun2* KO/SUN2 [full-length]-mCerulean).
- (G) The plasma membrane was visualised using FM4-64 staining in the gametophore initial cell after cell division. Bar, 20  $\mu$ m.
- (H) Scheme of division plane angle ( $\gamma$ ) measurement.
- (I) Quantification of division plane angle in cells. The angle  $\gamma$  defined in (H) was measured. Mean  $\pm$  SEM (from left to right):  $42.3 \pm 2.14$  (n = 16),  $38.9 \pm 4.19$  (n = 23),  $42.6 \pm 1.96$  (n = 24). P-values based on two-sided Steel–Dwass test: P = 0.9995 (control vs. *sun2* KO), P = 0.8988 (subapical cells: *sun2* KO vs. *sun2* KO/SUN2 [full-length]-mCerulean).

## Supplemental Figure 1

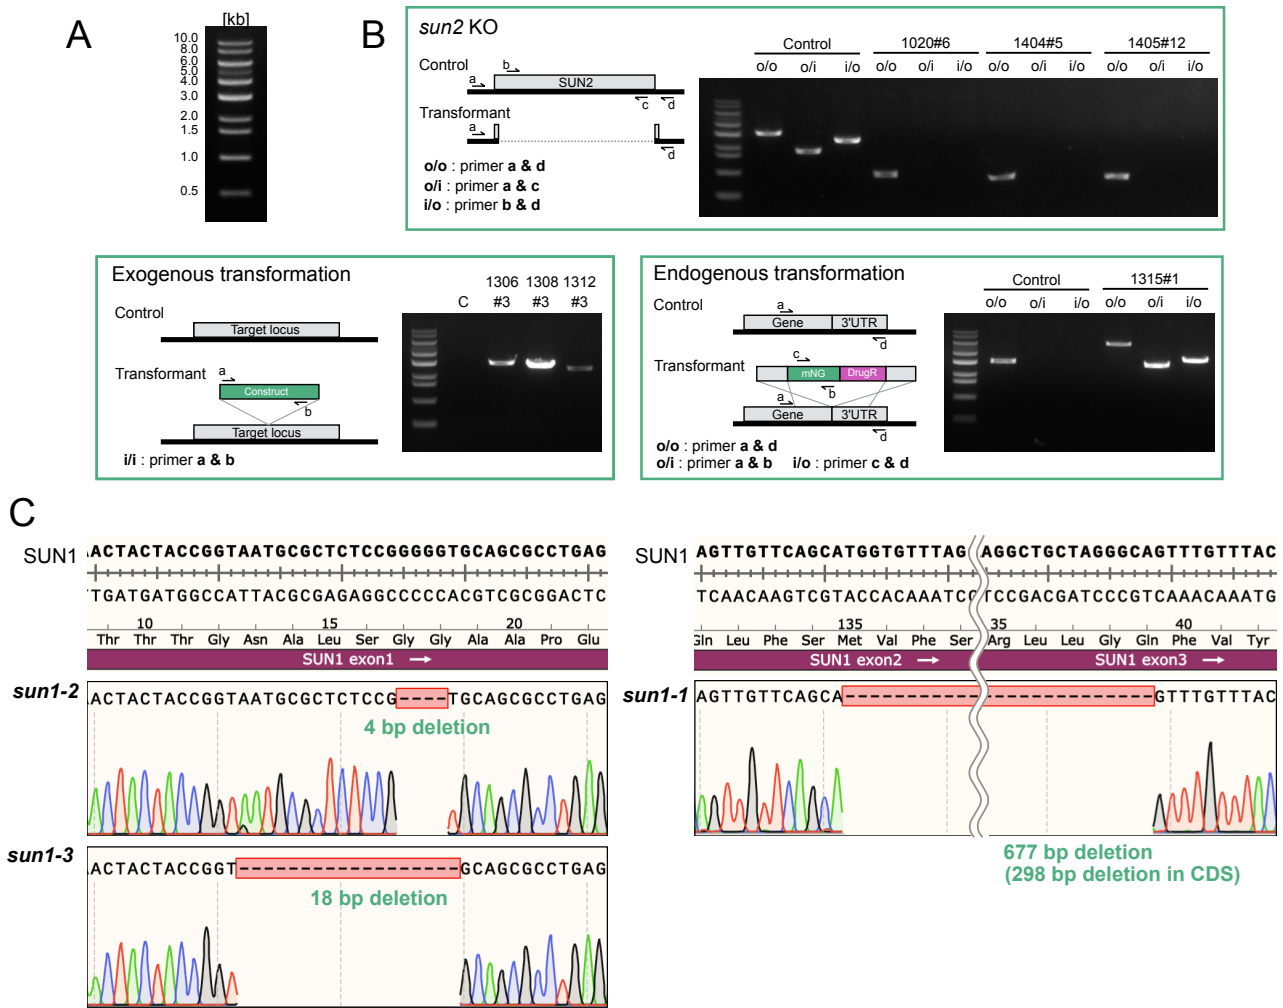

### Figure S1. Confirmation of the moss lines established in this study

(A) Band-size marker used in DNA gel electrophoresis.

(B) Genotyping PCR strategy (left) and PCR results (right) for the moss lines established in this study. Gene disruption using CRISPR/Cas9 technology (*sun2* KO), exogenous integration (rescue constructs), and C-terminal tagging (SUN2-mNG) are shown in separate boxes. The number in each lane indicates the line ID, and the genotype of each ID is listed in Table S1. "C" indicates the control (parental line). Primers used are listed in Table S4.

(C) Sequencing revealed base pair deletions in the *sun1* mutants used in this study (displayed in SnapGene sequence files).
